# Supplementary material for: Metal–organic framework derived inverse opal type 3D graphitic carbon for highly stable lithium-ion batteries
Source: Royal Society of Chemistry journal article supplement (doi:10.1039/d3nr02249h), 2023-01-01
Supplement: d3nr02249h1.pdf [file d3nr02249h1.pdf]

## Supplementary Information

# Metal-Organic Framework derived Inverse Opal type Porous Graphitic Carbon for Highly Stable Lithium-ion Batteries

*Nitish Kumar, Prakash Kumar Pathak, and Rahul R. Salunkhe\**

Department of Physics, Indian Institute of Technology Jammu Jagti, NH-44, PO Nagrota  
Jammu, 181 221, J&K, India

\* Corresponding author

[rahul.salunkhe@iitjammu.ac.in](mailto:rahul.salunkhe@iitjammu.ac.in) (Rahul R. Salunkhe)

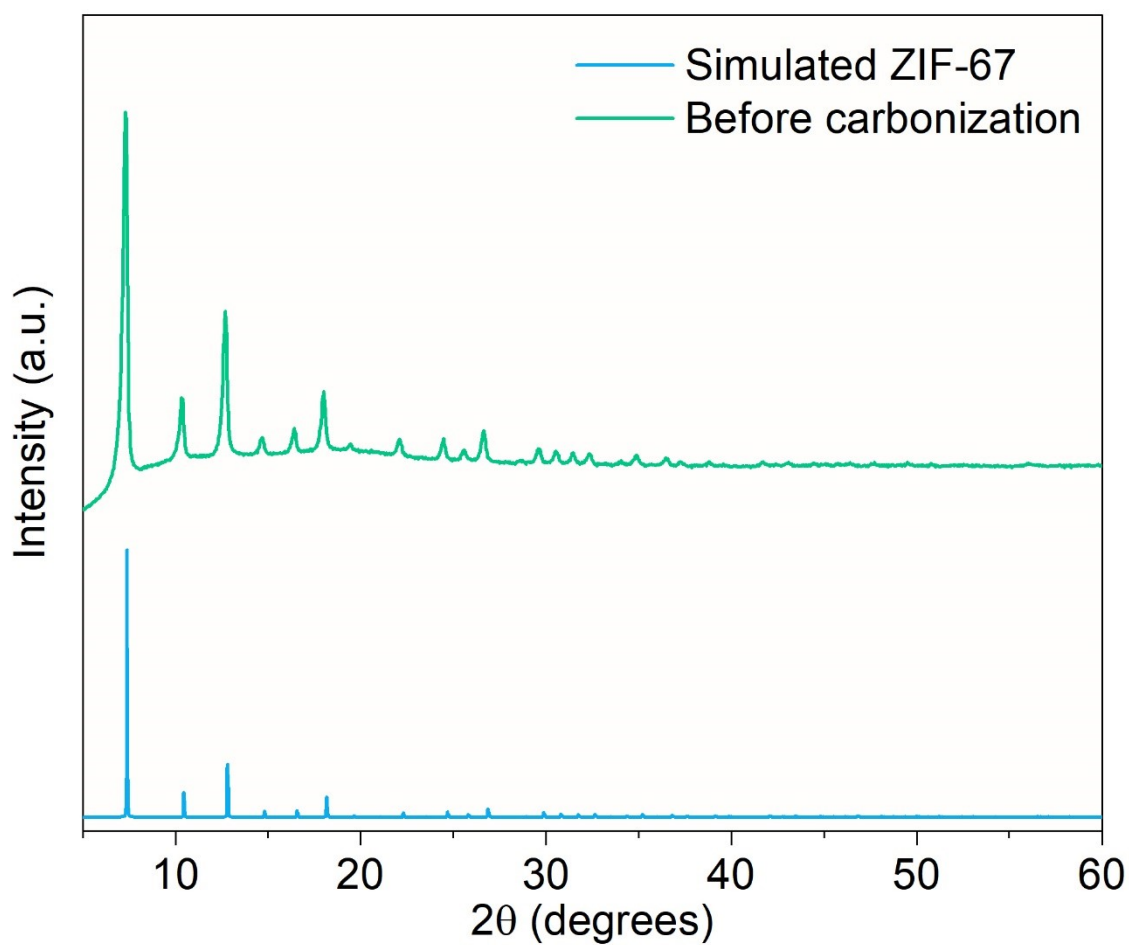

**Fig. S1.** Simulated XRD pattern of ZIF-67 and experimental XRD pattern obtained for PS-ZIF-67 precursor powder. Amorphous hump and peak broadness come from the composite material's PS particles. The sharp and correctly positioned crystalline peaks validate the synthesis of ZIF-67 particles.

**Table S1.** Atomic percentages of various elements in different samples as calculated by survey

| Sample Code      | Elements (at.%) |      |      |      |
|------------------|-----------------|------|------|------|
|                  | C               | N    | O    | Co   |
| <b>PS-ZIF-67</b> | 70.9            | 18.2 | 5.1  | 4.9  |
| <b>C-600</b>     | 91.55           | 4.3  | 4.1  | 0.95 |
| <b>C-700</b>     | 88.35           | 4.9  | 6.4  | 0.35 |
| <b>C-800</b>     | 91.8            | 3.5  | 4.5  | 0.2  |
| <b>C-900</b>     | 93.9            | 2.1  | 3.85 | 0.15 |

spectra.

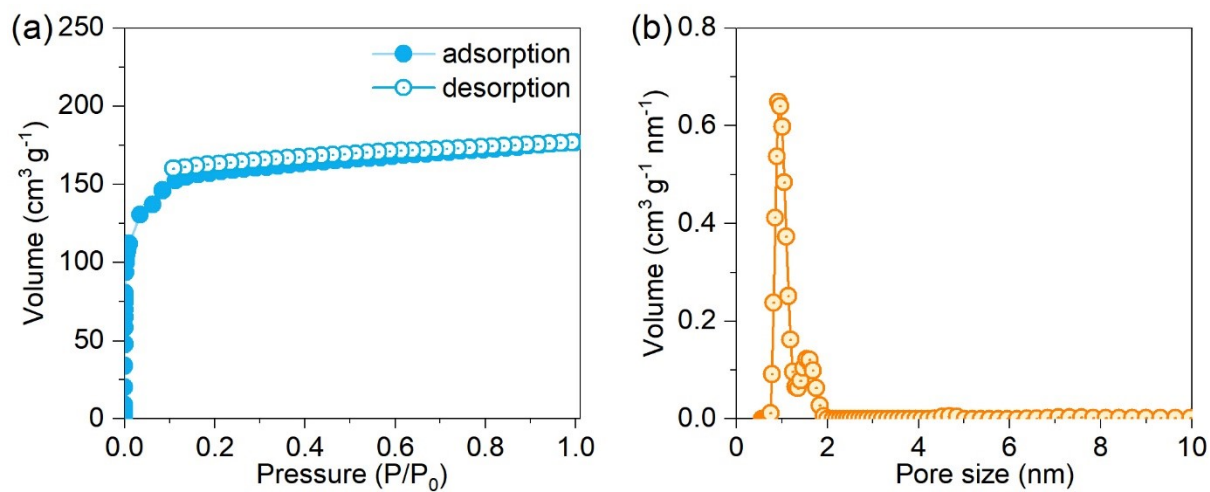

**Fig. S2.** (a) Nitrogen adsorption-desorption isotherms for PS-ZIF-67 sample, and (b) pore size distribution showing the presence of micropores developed by the attachment of ZIF-67 particles over the PS surface.

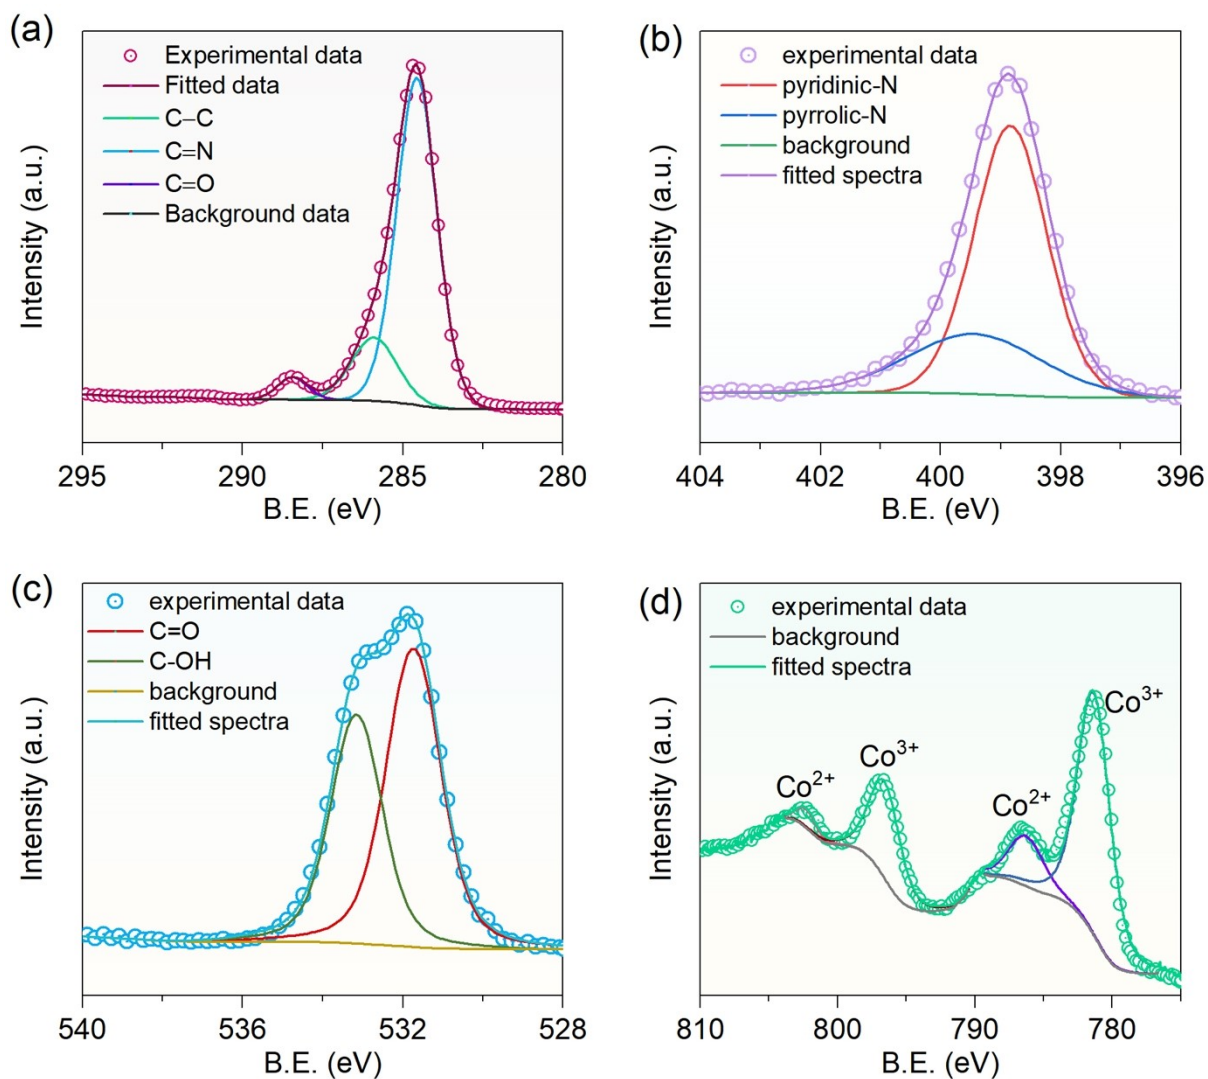

**Fig. S3.** The high-resolution narrow region deconvoluted spectra for (a) C 1s, (b) N 1s, (c) O 1s, and (d) Co elements.

**Table S2.** Raman peak positions for different observed bands.

| Sample | D    | G    | 2D   |
|--------|------|------|------|
| C-600  | 1342 | 1594 | 2682 |
| C-700  | 1347 | 1589 | 2686 |
| C-800  | 1343 | 1583 | 2683 |
| C-900  | 1343 | 1580 | 2683 |

**Table S3.** Atomic percentages of various deconvoluted bonding in different samples.

| Element code | Different deconvoluted peaks position and atomic percentages (eV, at. %) |              |                 |             |
|--------------|--------------------------------------------------------------------------|--------------|-----------------|-------------|
| <i>C 1s</i>  | C=C                                                                      | C-C/ C=N     | C=O             | C(O)-O      |
| C-600        | 284.5, 51.8                                                              | 285.2, 16.48 | 286.6, 25.12    | 289.3, 6.58 |
| C-700        | 284.3, 54.3                                                              | 284.9, 25.7  | 286, 12.3       | 288.5, 7.7  |
| C-800        | 284.4, 55.8                                                              | 284.9, 15.9  | 285.8, 21.6     | 288.6, 6.7  |
| C-900        | 284.5, 76.4                                                              | -            | 286, 16         | 288.7, 7.6  |
| <i>N 1s</i>  | Pyridinic-N                                                              | Pyrrolic-N   | NO <sub>2</sub> |             |
| C-600        | 398.6, 39.20                                                             | 400.6, 50.88 | 404.2, 10.1     |             |
| C-700        | 398.4, 54.5                                                              | 400, 45.5    | -               |             |
| C-800        | -                                                                        | 399.7, 100   | -               |             |
| C-900        | -                                                                        | 399.8, 100   | -               |             |
| <i>O 1s</i>  | C-O                                                                      | C=O          |                 |             |
| C-600        | 532.4, 64.5                                                              | 533.8, 46.5  |                 |             |
| C-700        | 532.2, 75.1                                                              | 533.7, 24.9  |                 |             |
| C-800        | 531.9, 53                                                                | 533.3, 47    |                 |             |
| C-900        | 532.1, 58.1                                                              | 533.4, 41.9  |                 |             |

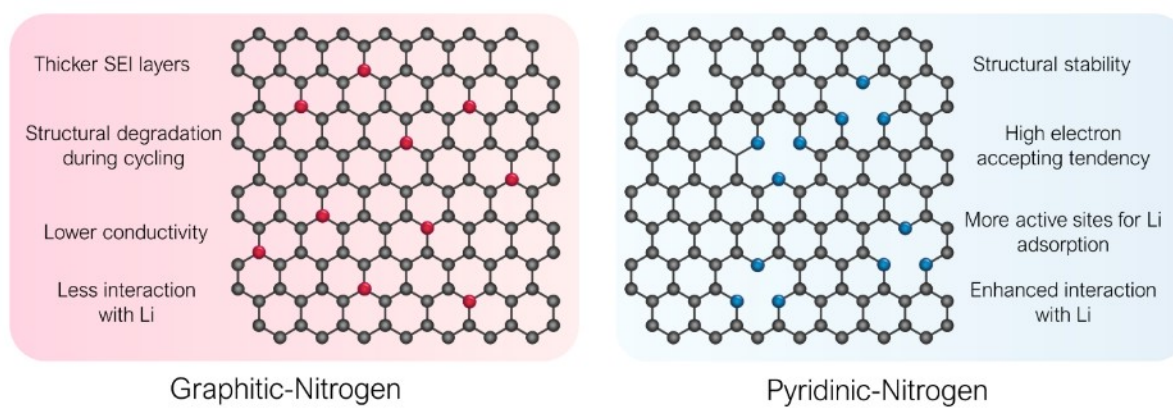

**Fig. S4.** Schematic representation of graphitic-N and pyridinic-N contents in graphene structure. The limitations of graphitic-N sites and the advantages of pyridinic-N sites are also highlighted.<sup>1</sup>



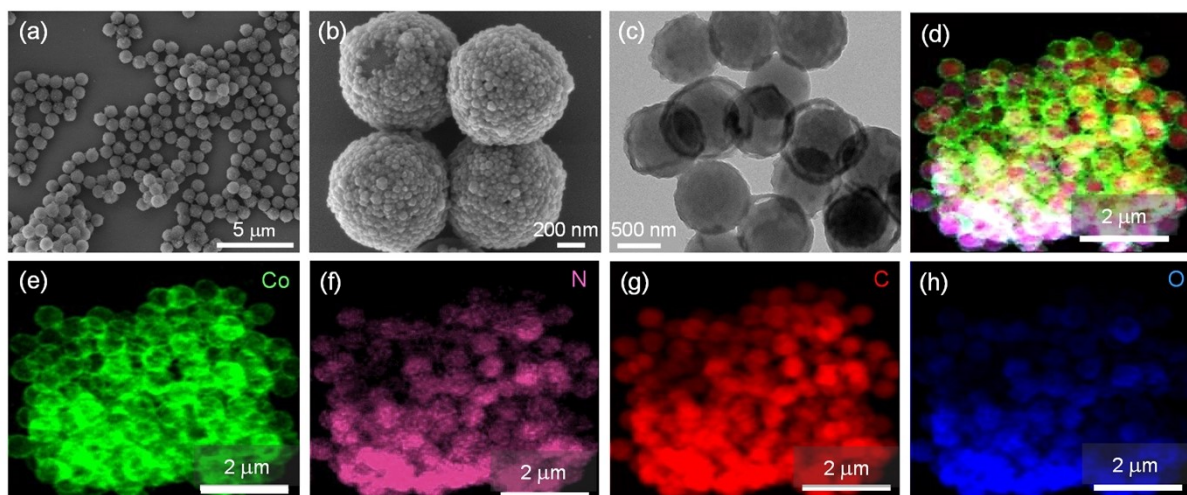

**Fig. S5.** FESEM images of PS-ZIF-67 sample. (a) The low magnification image shows the homogeneity of the developed sample, and (b) shows a PS core decorated with small-sized ZIF-67 particles. TEM studies for morphology and elemental distribution for PS-ZIF-67. (c) The bright field TEM image shows the PS core and ZIF-67 shell type of morphology. (d) The overlapped image for the region used for the EDS study and EDS mappings for (e) Co, (f) N, (g) C, and (h) O elements.

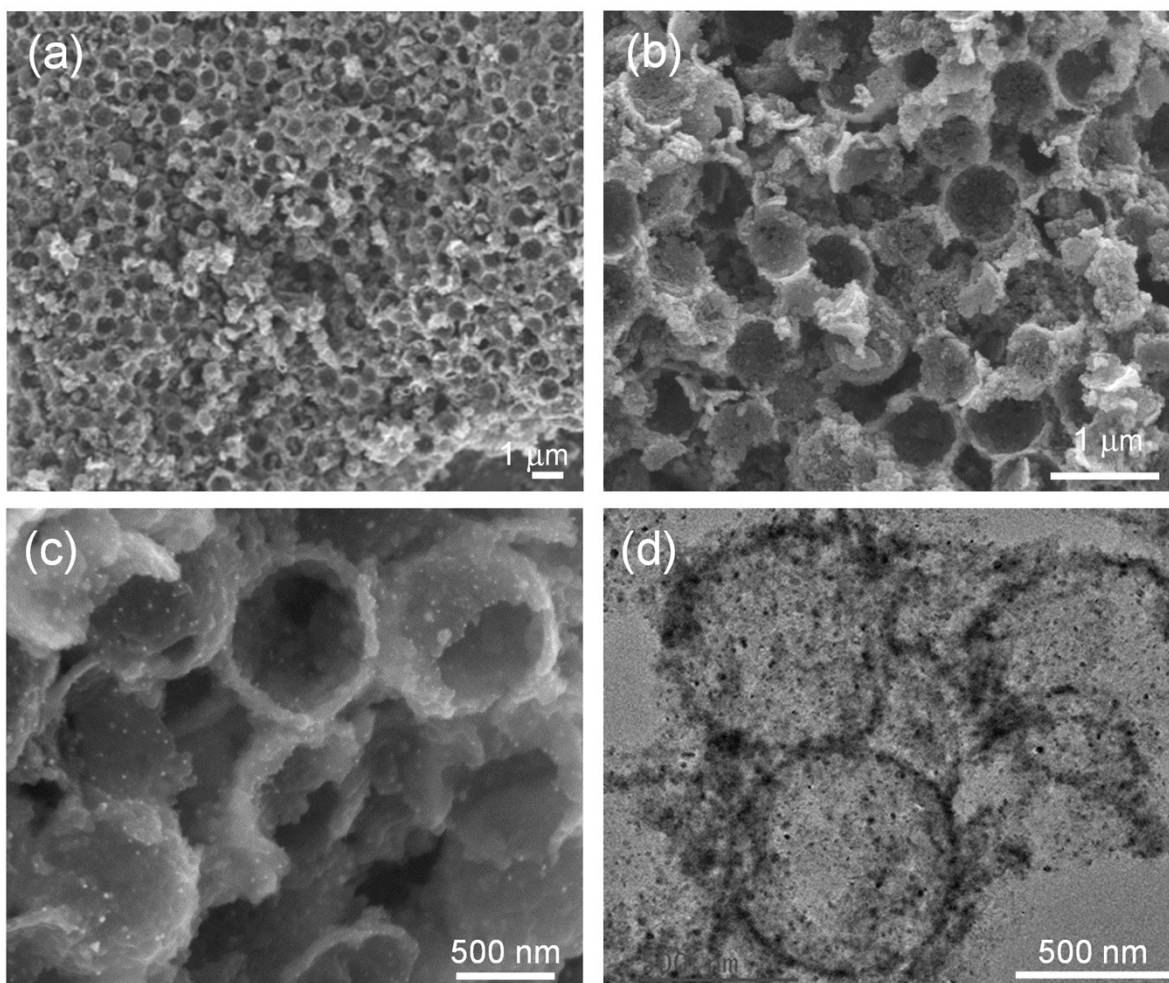

**Fig. S6.** Comprehensive morphological studies for C-700 sample. (a) Low magnification FESEM image shows the homogeneously developed 3D porous network in C-700, and (b) the image demonstrates the removal of the PS core. (c) High-magnification FESEM image depicts the hollow structure formed for the C-700 sample. (d) HRTEM image at low magnification showing the C-700 sample's morphology.

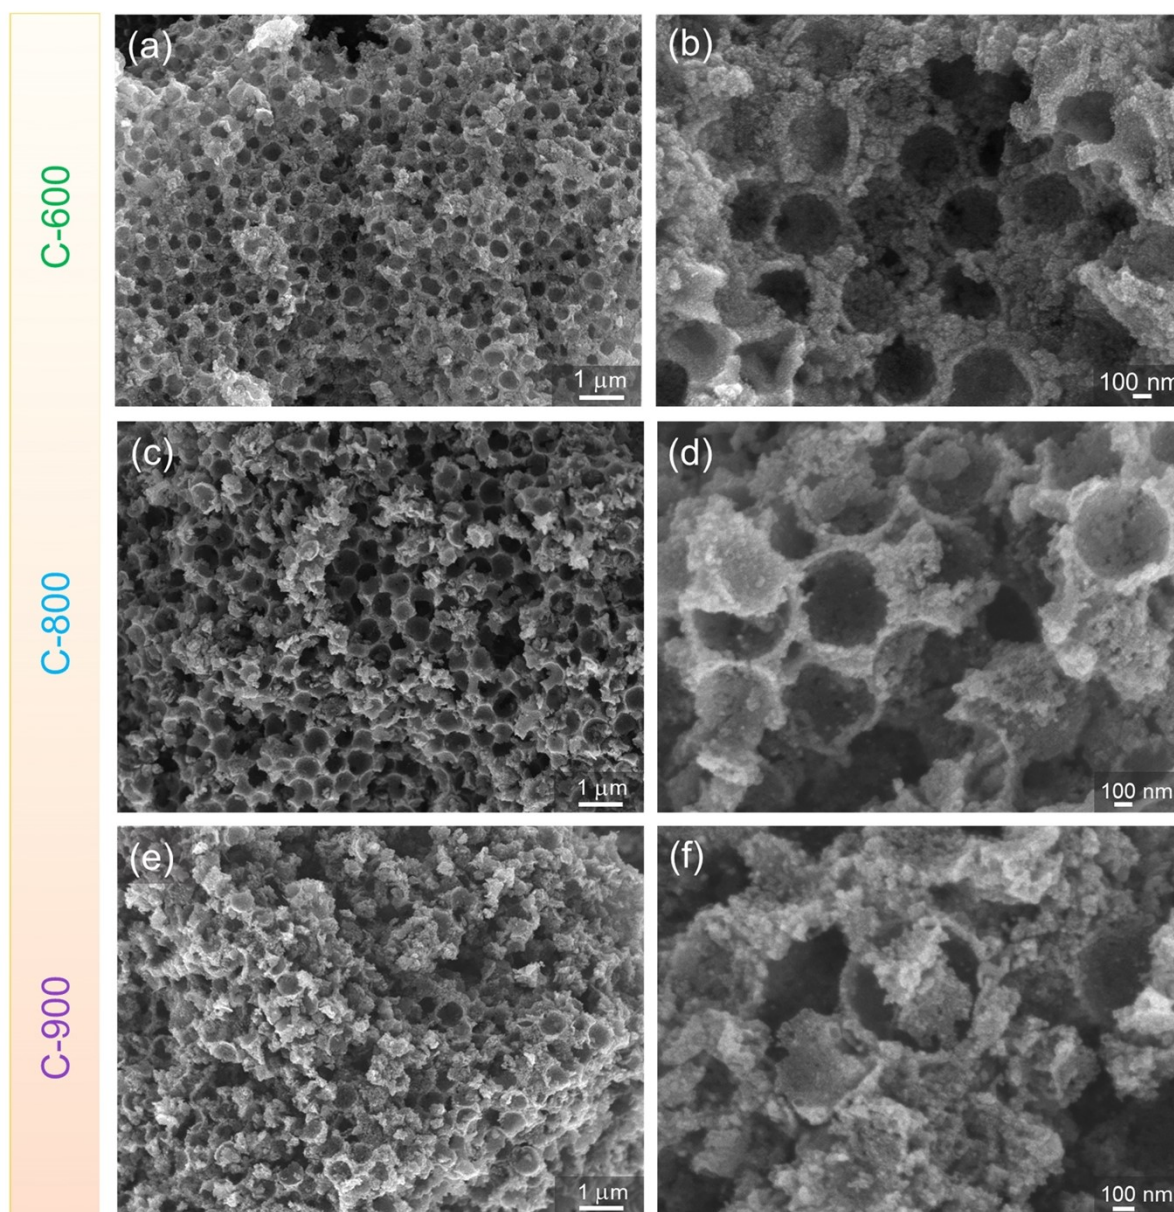

**Fig. S7.** FESEM images of C-600, C-800 and C-900 samples. (a) 3D porous structure, and (d) a high-resolution image of C-600. (c) The low magnification image and (d) the high magnification image shows a highly porous structure of C-800. (e) FESEM image shows a 3D porous structure at low magnification, and (f) the porous structure collapses due to the high-temperature treatment for C-900.

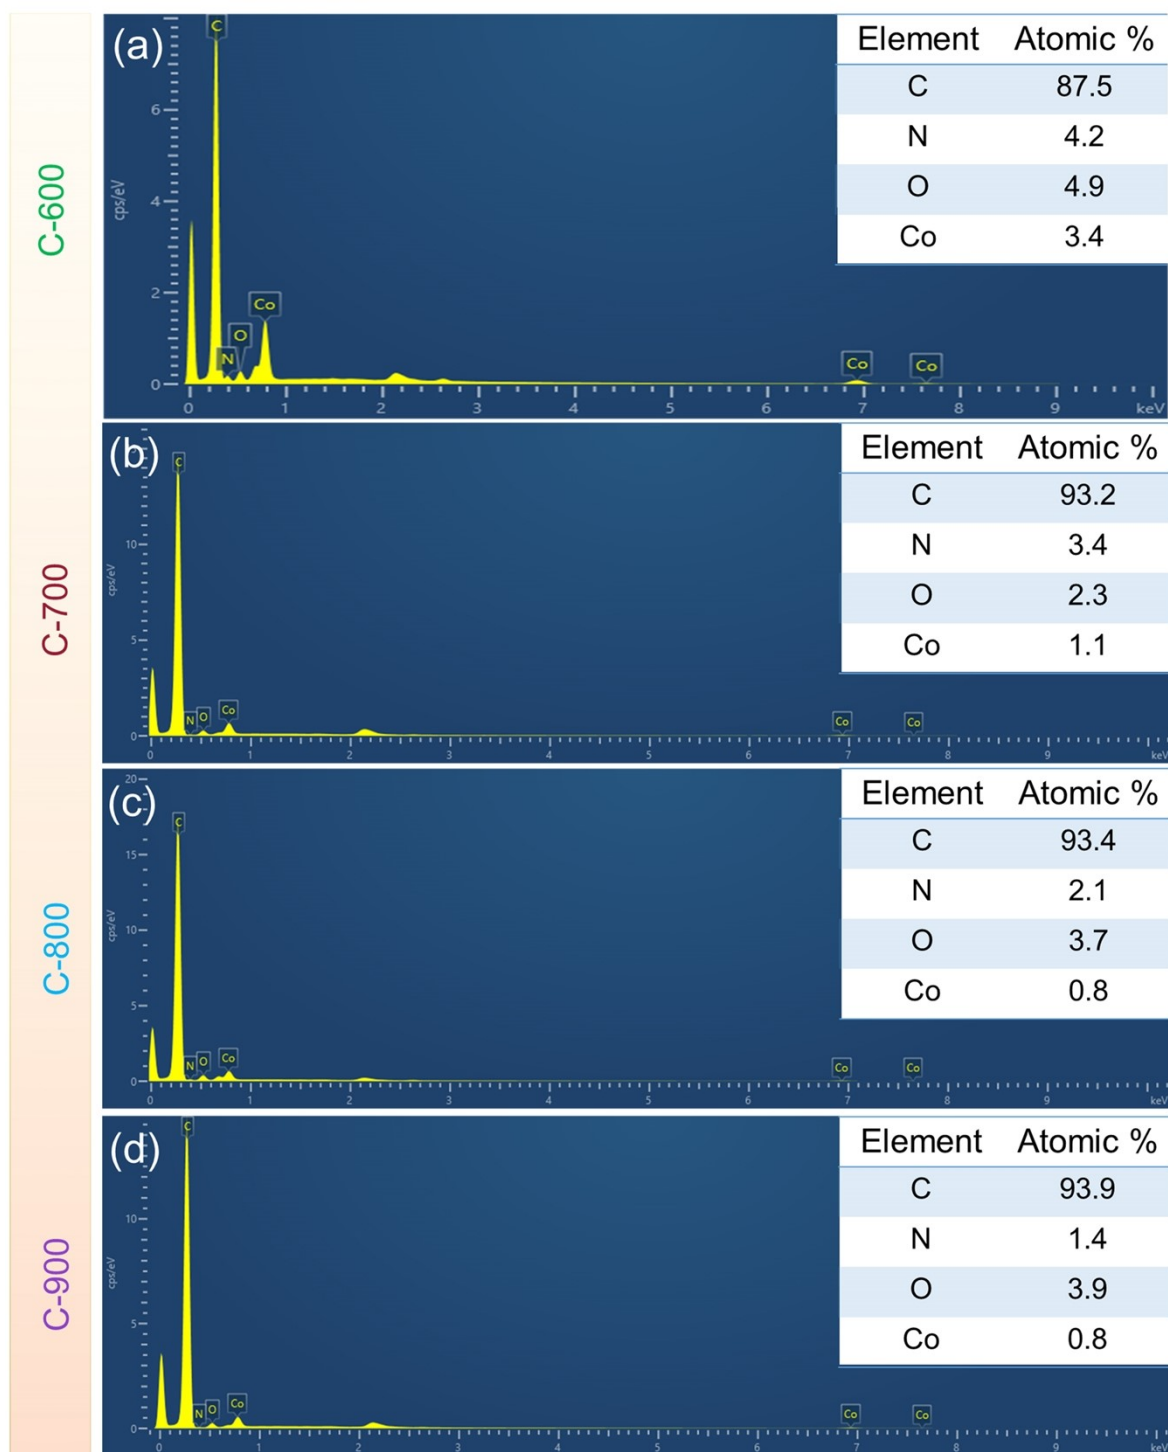

**Fig. S8.** EDS spectra show the presence of different elements in various carbonized samples, namely (a) C-600, (b) C-700, (c) C-800, and (d) C-900. The inset tables show the corresponding elements' atomic percentages.

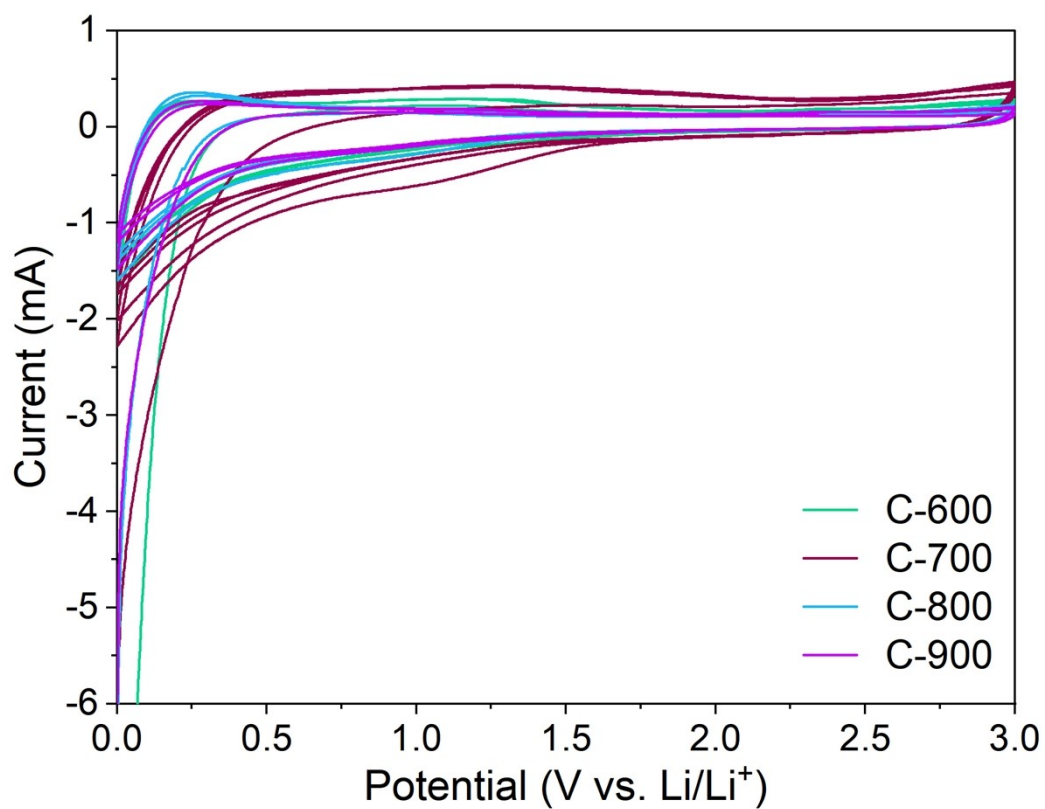

**Fig. S9.** Comparative precycling data for different samples at a scan rate of 1 mV s<sup>-1</sup>.

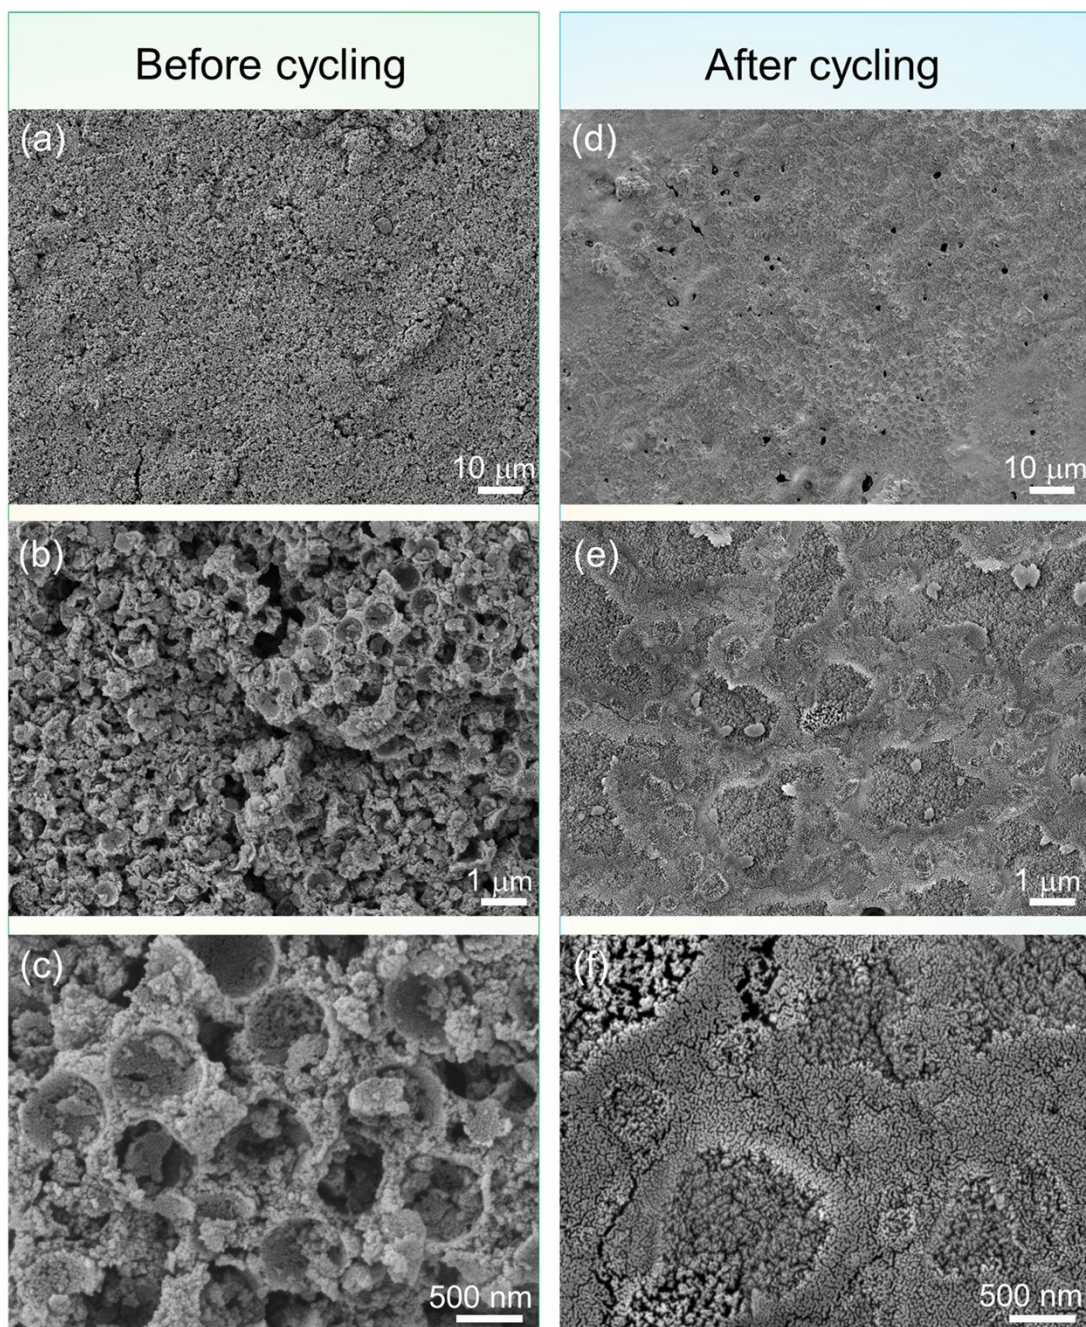

**Fig. S10.** FESEM images of (a-c) the fresh coin cell, and after long cycle testing (d-f) at different magnifications.

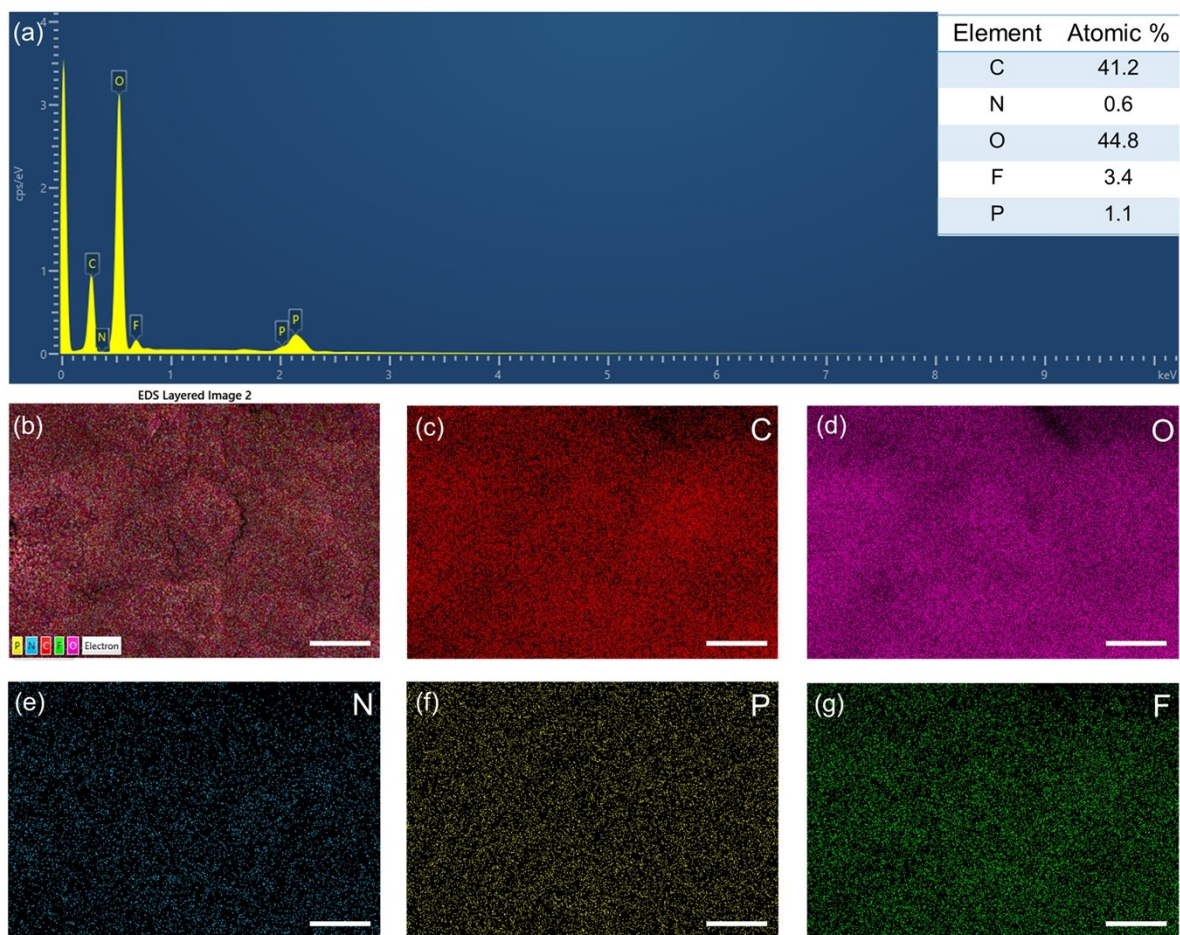

**Fig. S11.** EDS studies after long cycle testing. (a) EDS spectra showing the elemental composition, (b) EDS layered image showing overlapped elements, and mapping of elements (c) C, (d) O, (e) N, (f) P, and (g) F. The scale bar is 1 μm in length.

**Table S4** Performance comparison of our sample with previous literature reports.

| No. | Material                                                    | Specific capacity with current density (mA h g <sup>-1</sup> ) | No. of cycles tested with current density | Cyclic retention (%) | Ref.             |
|-----|-------------------------------------------------------------|----------------------------------------------------------------|-------------------------------------------|----------------------|------------------|
| 1.  | Nitrogen-deficient g-C <sub>3</sub> N <sub>4</sub>          | 647 at 100 mA g <sup>-1</sup>                                  | 5000 at 1 A g <sup>-1</sup>               | -                    | 2                |
| 2.  | TiO <sub>2</sub> (B)/Carbon Core/Shell Nanotubes            | 479.2 at 1 C                                                   | 1000 at 1C                                | ~100                 | 3                |
| 3.  | Porous GC from coal tar pitch                               | 707 at 0.05 A g <sup>-1</sup>                                  | 1000 at 1 A g <sup>-1</sup>               | 93.5                 | 4                |
| 4.  | Biomass-derived GC                                          | 471 at 100 mA g <sup>-1</sup>                                  | -                                         | -                    | 5                |
| 5.  | Porous GC Nanosheets                                        | 722 at 100 mA g <sup>-1</sup>                                  | 570 at 30 C                               | 65                   | 6                |
| 6.  | H-TiO <sub>2</sub> /GC hollow spheres                       | 225 at 100 mA g <sup>-1</sup>                                  | 1000 at 1 A g <sup>-1</sup>               | 92                   | 7                |
| 7.  | Ni <sub>2</sub> P/GC nanostructure                          | 385 at 100 mA g <sup>-1</sup>                                  | 200 at 100 mA g <sup>-1</sup>             | 87.3                 | 8                |
| 8.  | CoSe/Co@N doped GC                                          | 630 at 200 mA g <sup>-1</sup>                                  | -                                         | -                    | 9                |
| 9.  | Nitrogen-doped carbons with ultrafine Sn particles embedded | 408 at 100 mA g <sup>-1</sup>                                  | -                                         | -                    | 10               |
| 10. | Highly GC derived from Coconut Coir Waste                   | 397 at 0.05 C                                                  | -                                         | -                    | 11               |
| 11. | Chitosan-derived graphitic carbon@Fe <sub>3</sub> C         | 423 at 100 mA g <sup>-1</sup>                                  | 200 at 2 A g <sup>-1</sup>                | 85                   | 12               |
| 12. | ZnO/3D OMC                                                  | 673 at 0.1 C                                                   | 300                                       | -                    | 13               |
| 13. | ZnO/3D OM-mC                                                | 973.3 at 0.1 C                                                 | 100                                       | -                    | 14               |
| 14. | TiO <sub>2</sub> -CN                                        | 549 at 0.2 C                                                   | 100                                       | -                    | 15               |
| 15. | 3DOM ZnO/CC                                                 | 911 at 0.1 A g <sup>-1</sup>                                   | 100                                       | -                    | 16               |
| 16. | C@Fe <sub>2</sub> O <sub>3</sub> @SnO <sub>2</sub>          | 388 at 0.1 A g <sup>-1</sup>                                   | 200                                       | -                    | 17               |
| 17. | CoO@3D OMC                                                  | 673.3 at 2 A g <sup>-1</sup>                                   | 1000                                      | -                    | 18               |
| 18. | 3DOM SnO <sub>2</sub>                                       | 653 at 2 C                                                     | 50                                        | 52                   | 19               |
| 19. | Rutile TiO <sub>2</sub> Inverse Opal                        | 608 at 75 mA g <sup>-1</sup>                                   | 1000                                      | 53                   | 20               |
| 20. | Natural graphite                                            | 360.9 at 0.1 C                                                 | 200                                       | 89                   | 21               |
| 21. | <b>C-700</b>                                                | <b>755 at 50 mA g<sup>-1</sup><br/>805 after 65 cycles</b>     | <b>2000 at 1 A g<sup>-1</sup></b>         | <b>96%</b>           | <b>This work</b> |

\* GC= graphitic carbon, 3D= three dimensional, OMC= ordered macroporous carbon, OM-mC = ordered macro-mesoporous carbon, CN= Carbon nanocomposites, 3DOM= three dimensional ordered macroporous,



### Note S1.

The reaction kinetics can be explained by Dunn's method, which provides information about diffusion-controlled processes. The current calculated from this method is

$$i = av^b \quad (1)$$

$$I(v) = k_1 (v)^{0.5} + k_2 v \quad (2)$$

$$\frac{I(v)}{v^{0.5}} = k_1 + k_2 v^{0.5} \quad (3)$$

Where  $I(v) \propto v \Rightarrow k_1 v =$  capacitive current

$I(v) \propto v^{0.5} \Rightarrow k_1 v^{0.5} =$  Diffusion-controlled current.

Where  $k_1$ ,  $k_2$ , and are intercept, slope, and scan rates for C-700 at different scan rates (0.2 – 2 mV s<sup>-1</sup>).

In addition, the Galvanostatic Intermittent Titration Technique (GITT) was used to quantify the ions' diffusion coefficients, which were then estimated using equation (7), shown below.

The formula for determining GITT using *Fick's second law*<sup>22</sup>:

$$D = \frac{4L^2 (\Delta E_s)}{\pi \tau (\Delta E_\tau)^2} \quad (4)$$

Here,  $L$  is the ion diffusion distance (cm), and the pulse time of the current pulse is denoted by  $\tau$  (s). " $\Delta E_s$ " is the voltage difference measured at the end of the relaxation period for two successive steps, and " $\Delta E_\tau$ " is the difference between the initial voltage and final voltage during the discharge pulse time after eliminating the IR drop.

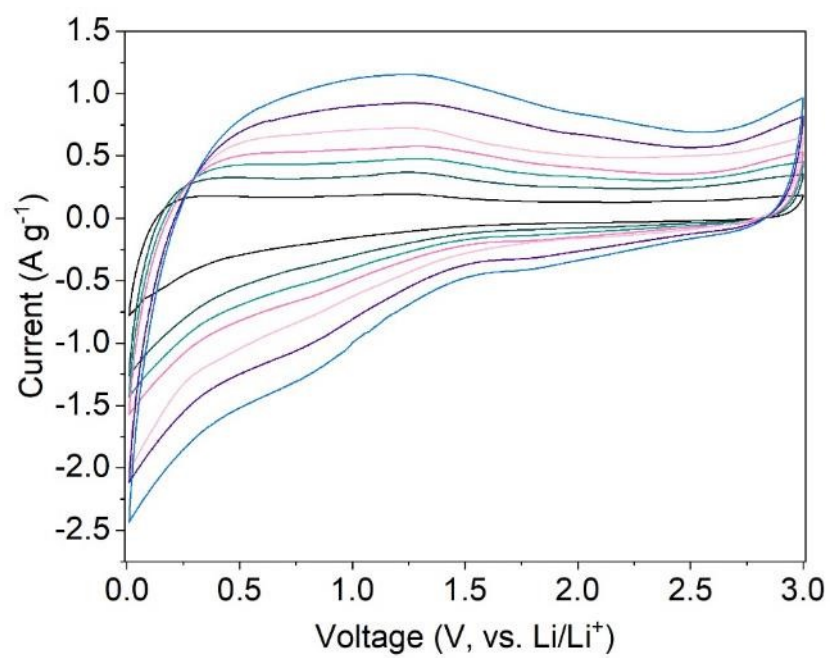

**Fig. S12.** CV curves at different scan rates varying from 0.2 to 2  $\text{mV s}^{-1}$ . Dunn's method used these scan rates for "b" value calculations.

## References

- (1) Ma, C.; Shao, X.; Cao, D. Nitrogen-Doped Graphene Nanosheets as Anode Materials for Lithium Ion Batteries: A First-Principles Study. *J. Mater. Chem.* **2012**, *22* (18), 8911–8915.
- (2) Sun, S.; Wu, Y.; Zhu, J.; Lu, C.; Sun, Y.; Wang, Z.; Chen, J. Stabilizing Plasma-Induced Highly Nitrogen-Deficient g-C<sub>3</sub>N<sub>4</sub> by Heteroatom-Refilling for Excellent Lithium-Ion Battery Anodes. *Chem. Eng. J.* **2022**, *427*, 131032.
- (3) Zhu, X.; Yang, X.; Lv, C.; Guo, S.; Li, J.; Zheng, Z.; Zhu, H.; Yang, D. New Approach to Create TiO<sub>2</sub> (B)/Carbon Core/Shell Nanotubes: Ideal Structure for Enhanced Lithium Ion Storage. *ACS Appl. Mater. Interfaces* **2016**, *8* (29), 18815–18821.
- (4) Xing, B.; Zhang, C.; Liu, Q.; Zhang, C.; Huang, G.; Guo, H.; Cao, J.; Cao, Y.; Yu, J.; Chen, Z. Green Synthesis of Porous Graphitic Carbons from Coal Tar Pitch Templated by Nano-CaCO<sub>3</sub> for High-Performance Lithium-Ion Batteries. *J. Alloys Compd.* **2019**, *795*, 91–102.
- (5) Han, S.-W.; Jung, D.-W.; Jeong, J.-H.; Oh, E.-S. Effect of Pyrolysis Temperature on Carbon Obtained from Green Tea Biomass for Superior Lithium Ion Battery Anodes. *Chem. Eng. J.* **2014**, *254*, 597–604.
- (6) Chen, L.; Wang, Z.; He, C.; Zhao, N.; Shi, C.; Liu, E.; Li, J. Porous Graphitic Carbon Nanosheets as a High-Rate Anode Material for Lithium-Ion Batteries. *ACS Appl. Mater. Interfaces* **2013**, *5* (19), 9537–9545.
- (7) Liu, H.; Li, W.; Shen, D.; Zhao, D.; Wang, G. Graphitic Carbon Conformal Coating of Mesoporous TiO<sub>2</sub> Hollow Spheres for High-Performance Lithium Ion Battery Anodes. *J. Am. Chem. Soc.* **2015**, *137* (40), 13161–13166.
- (8) Kim, Y.-S.; Kim, M.-C.; Moon, S.-H.; Kim, H.; Park, K.-W. Ni<sub>2</sub>P/Graphitic Carbon Nanostructure Electrode with Superior Electrochemical Performance. *Electrochim. Acta* **2020**, *341*, 136045.
- (9) Zhou, Y.; Tian, R.; Duan, H.; Wang, K.; Guo, Y.; Li, H.; Liu, H. CoSe/Co Nanoparticles Wrapped by in Situ Grown N-Doped Graphitic Carbon Nanosheets as Anode Material for Advanced Lithium Ion Batteries. *J. Power Sources* **2018**, *399*, 223–230.
- (10) Bi, H.; Li, X.; Chen, J.; Zhang, L.; Bie, L. Ultrahigh Nitrogen-Doped Carbon/Superfine-Sn Particles for Lithium Ion Battery Anode. *J. Mater. Sci. Mater. Electron.* **2020**, *31* (24), 22224–22238.
- (11) Destyorini, F.; Amalia, W. C.; Irmawati, Y.; Hardiansyah, A.; Priyono, S.; Aulia, F.; Oktaviano, H. S.; Hsu, Y.-I.; Yudianti, R.; Uyama, H. High Graphitic Carbon Derived from Coconut Coir Waste by Promoting Potassium Hydroxide in the Catalytic Graphitization Process for Lithium-Ion Battery Anodes. *Energy & Fuels* **2022**, *36* (10), 5444–5455.
- (12) Li, B.; Zhang, Y.; Xiong, J.; Gui, Y.; Huang, T.; Peng, J.; Liu, H.; Yang, F.; Li, M. Chitosan-Derived Graphitic Carbon@Fe<sub>3</sub>C as Anode Materials for Lithium Ion Battery. *J. Mater. Sci.* **2022**, *57* (22), 9939–9954.
- (13) Zhang, C.; Zhang, Z.; Yin, F.; Zhang, Y.; Mentbayeva, A.; Babaa, M.-R.; Molkenova, A.; Bakenov, Z. 3D Ordered Macroporous Carbon Encapsulated ZnO Nanoparticles as a High-Performance Anode for Lithium-Ion Batteries. *ChemElectroChem* **2017**, *4* (9), 2359–2365.

- (14) Yin, F.; Zhang, Z.; Zhang, Y.; Zhang, C.; Xu, L. ZnO Nanoparticles Encapsulated in Three Dimensional Ordered Macro-/Mesoporous Carbon as High-Performance Anode for Lithium-Ion Battery. *Electrochim. Acta* **2018**, *270*, 274–283.
- (15) Song, L.; Li, L.; Gao, X.; Zhao, J.; Lu, T.; Liu, Z. A Facile Synthesis of a Uniform Constitution of Three-Dimensionally Ordered Macroporous TiO<sub>2</sub>–Carbon Nanocomposites with Hierarchical Pores for Lithium Ion Batteries. *J. Mater. Chem. A* **2015**, *3* (13), 6862–6872.
- (16) Shen, K.; Cai, S.; Ling, R.; Xie, D.; Li, X.; Sun, J.; Wei, J.; Sun, X. Flexible, Three-Dimensional Ordered Macroporous ZnO Electrode with Enhanced Electrochemical Performance in Lithium-Ion Batteries. *Microporous Mesoporous Mater.* **2019**, *289*, 109618.
- (17) Zhu, X.; Ren, W.; Cheng, C.; Yang, Y. Three-Dimensional Carbon@Fe<sub>2</sub>O<sub>3</sub>@SnO<sub>2</sub> Hierarchical Inverse Opals Arrays as Li-Ion Battery Anode with Improved Cycling Life and Rate Capability. *ChemistrySelect* **2017**, *2* (11), 3223–3230.
- (18) Huang, X.; Chen, J.; Lu, Z.; Yu, H.; Yan, Q.; Hng, H. H. Carbon Inverse Opal Entrapped with Electrode Active Nanoparticles as High-Performance Anode for Lithium-Ion Batteries. *Sci. Rep.* **2013**, *3* (1), 2317.
- (19) Li, Z.; Tan, Y.; Huang, X.; Zhang, W.; Gao, Y.; Tang, B. Three-Dimensionally Ordered Macroporous SnO<sub>2</sub> as Anode Materials for Lithium Ion Batteries. *Ceram. Int.* **2016**, *42* (16), 18887–18893.
- (20) McNulty, D.; Carroll, E.; O'Dwyer, C. Rutile TiO<sub>2</sub> Inverse Opal Anodes for Li-Ion Batteries with Long Cycle Life, High-Rate Capability, and High Structural Stability. *Adv. Energy Mater.* **2017**, *7* (12), 1602291.
- (21) Shi, Q.; Liu, W.; Qu, Q.; Gao, T.; Wang, Y.; Liu, G.; Battaglia, V. S.; Zheng, H. Robust Solid/Electrolyte Interphase on Graphite Anode to Suppress Lithium Inventory Loss in Lithium-Ion Batteries. *Carbon* **2017**, *111*, 291–298.
- (22) Weppner, W.; Huggins, R. A. Determination of the Kinetic Parameters of Mixed-Conducting Electrodes and Application to the System Li<sub>3</sub>Sb. *J. Electrochem. Soc.* **1977**, *124* (10), 1569–1578.
